# Supplementary material
Source: PubMed Central journal article supplement (PMC2799163)
Supplement: supp_137.2.323_DEV045047TableS1.pdf [file supp_137.2.323_DEV045047TableS1.pdf]

**Table S1. Effect of *fru*<sup>P1.LexA</sup> on male courtship behavior**

| Genotype                                                                         | CI (m → f) | % fertile males | ChI     |       |       |       |       |
|----------------------------------------------------------------------------------|------------|-----------------|---------|-------|-------|-------|-------|
|                                                                                  |            |                 | Day 1   | Day 2 | Day 3 | Day 4 | Day 5 |
| <i>w; lexAop-rCD2::GFP; fru</i> <sup>P1.LexA</sup> /+                            | 44±6 (24)  | 100 (20)        | 0±0 (3) | 0±0   | 0±0   | 0±0   | 0±0   |
| <i>w; lexAop-rCD2::GFP; fru</i> <sup>P1.LexA</sup> / <i>fru</i> <sup>4-40</sup>  | 0±0 (20)   | 0 (20)          | 0±0 (4) | 4±2   | 50±11 | 46±12 | 63±13 |
| <i>w; lexAop-rCD2::GFP; fru</i> <sup>P1.LexA</sup> / <i>fru</i> <sup>sat15</sup> | 0±0 (20)   | 0 (20)          | 2±1 (4) | 5±2   | 14±5  | 53±10 | 26±10 |
| <i>w; lexAop-rCD2::GFP/+; fru</i> <sup>P1.LexA</sup> / <i>fru</i> <sup>w24</sup> | 0±0 (20)   | not tested      | 0±0 (3) | 0±0   | 0±0   | 0±0   | 0±0   |

Means are shown ± s.e.m. Sample size is given in parentheses. ChI (*n*) refers to the number of groups of 8 males. CI, courtship index; ChI, chaining index.
