# Supplementary material
Source: PubMed Central journal article supplement (PMC2799163)

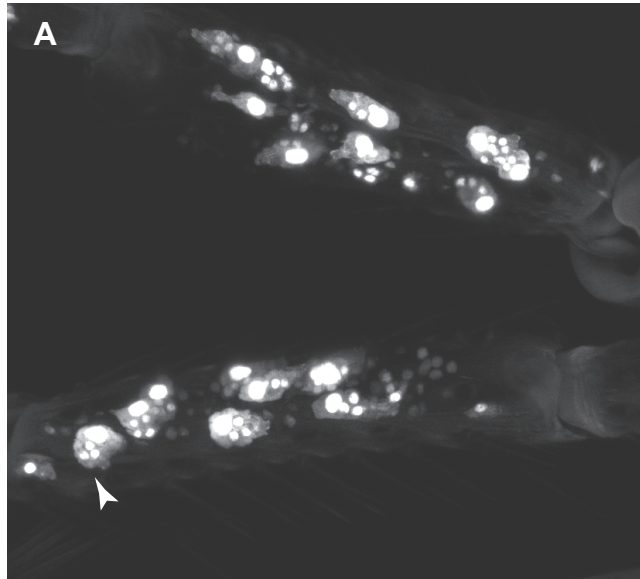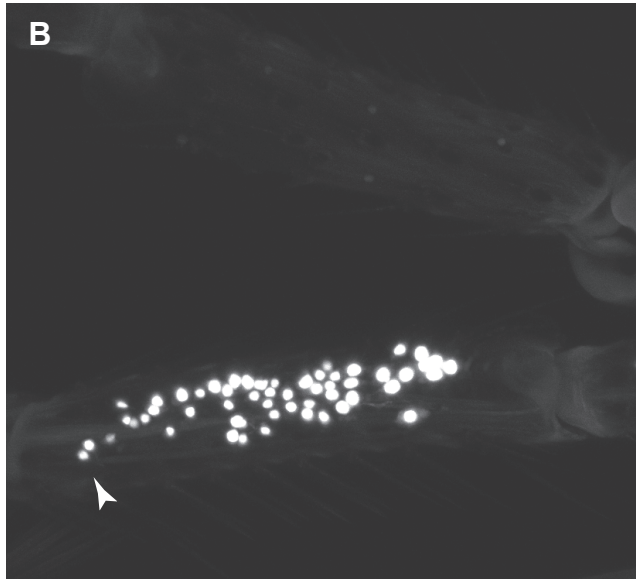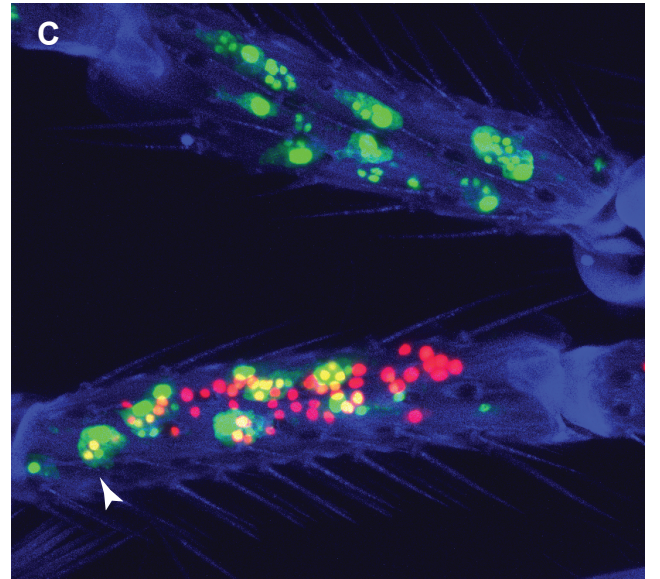

Supplement: supp_137.2.323_045047-FigS1.pdf [file supp_137.2.323_045047-FigS1.pdf]
